# Supplementary material for: Age and sex-associated variation in the multi-site microbiome of an entire social group of free-ranging rhesus macaques
Source: PubMed Central journal article supplement (PMC7986251; doi:10.1186/s40168-021-01009-w), 2021-03-22
Supplement: 40168_2021_1009_MOESM2_ESM.pdf [file 40168_2021_1009_MOESM2_ESM.pdf]

1 **Supplemental Tables and Figures**

2

3 **Janiak et al.** Age and sex-associated variation in the multi-site microbiome of an entire social  
 4 group of free-ranging rhesus macaques.

5

6 **Table S1. Pairwise adonis results - rectal**

7

| Pairs (age groups) | Df | SumsOfSqs | F.Model   | R2         | p.value | P.adjusted (Bonferroni) | sig |
|--------------------|----|-----------|-----------|------------|---------|-------------------------|-----|
| 5-9 vs 1-4         | 1  | 0.2375699 | 1.1876946 | 0.02320274 | 0.228   | 1.00                    |     |
| 5-9 vs <1          | 1  | 1.7293658 | 8.9764289 | 0.16036087 | 0.001   | 0.01                    | *   |
| 5-9 vs ≥15         | 1  | 0.1521490 | 0.7986834 | 0.02006809 | 0.689   | 1.00                    |     |
| 5-9 vs 10-14       | 1  | 0.2290475 | 1.2192706 | 0.02582146 | 0.206   | 1.00                    |     |
| 1-4 vs <1          | 1  | 1.2839041 | 6.1271395 | 0.13001297 | 0.001   | 0.01                    | *   |
| 1-4 vs ≥15         | 1  | 0.1869239 | 0.8855220 | 0.02613275 | 0.616   | 1.00                    |     |
| 1-4 vs 10-14       | 1  | 0.1548619 | 0.7574719 | 0.01858486 | 0.786   | 1.00                    |     |
| <1 vs ≥15          | 1  | 0.9892766 | 4.9303748 | 0.14114864 | 0.001   | 0.01                    | *   |
| <1 vs 10-14        | 1  | 1.2281542 | 6.2839658 | 0.14517999 | 0.001   | 0.01                    | *   |
| ≥15 vs 10-14       | 1  | 0.1778731 | 0.9201401 | 0.03075320 | 0.514   | 1.00                    |     |

8

9

10 **Table S2. Pairwise adonis results - oral**

11

| Pairs (age groups) | Df | SumsOfSqs  | F.Model   | R2         | p.value | P.adjusted (Bonferroni) | sig |
|--------------------|----|------------|-----------|------------|---------|-------------------------|-----|
| 5-9 vs 1-4         | 1  | 0.07912499 | 0.5333619 | 0.01055465 | 0.844   | 1.00                    |     |
| 5-9 vs <1          | 1  | 1.12275664 | 8.4124109 | 0.15181456 | 0.001   | 0.01                    | *   |
| 5-9 vs ≥15         | 1  | 0.12918209 | 0.8771434 | 0.02199614 | 0.494   | 1.00                    |     |
| 5-9 vs 10-14       | 1  | 0.06938743 | 0.4816977 | 0.01014491 | 0.877   | 1.00                    |     |
| 1-4 vs <1          | 1  | 1.13384122 | 8.4223219 | 0.17041534 | 0.001   | 0.01                    | *   |
| 1-4 vs ≥15         | 1  | 0.13159236 | 0.8701637 | 0.02569116 | 0.478   | 1.00                    |     |
| 1-4 vs 10-14       | 1  | 0.06529297 | 0.4449099 | 0.01073497 | 0.897   | 1.00                    |     |
| <1 vs ≥15          | 1  | 1.04039755 | 8.1159586 | 0.21292810 | 0.001   | 0.01                    | *   |
| <1 vs 10-14        | 1  | 1.18951851 | 9.2774217 | 0.19623366 | 0.001   | 0.01                    | *   |
| ≥15 vs 10-14       | 1  | 0.06527936 | 0.4509110 | 0.01480780 | 0.890   | 1.00                    |     |

12

13 **Table S3. Pairwise adonis results - penile**  
 14

| Pairs (age groups) | Df | SumsOfSqs | F.Model  | R2         | p.value | P.adjusted (Bonferroni) | sig |
|--------------------|----|-----------|----------|------------|---------|-------------------------|-----|
| 5-9 vs 1-4         | 1  | 1.7139822 | 7.997804 | 0.29623905 | 0.001   | 0.01                    | *   |
| 5-9 vs <1          | 1  | 0.7717289 | 3.293306 | 0.17069684 | 0.006   | 0.06                    |     |
| 5-9 vs ≥15         | 1  | 0.6375467 | 2.572801 | 0.17654814 | 0.010   | 0.10                    |     |
| 5-9 vs 10-14       | 1  | 0.3041139 | 1.238296 | 0.08126213 | 0.220   | 1.00                    |     |
| 1-4 vs <1          | 1  | 1.2115768 | 5.089853 | 0.23041589 | 0.001   | 0.01                    | *   |
| 1-4 vs ≥15         | 1  | 0.3613845 | 1.436279 | 0.09949095 | 0.178   | 1.00                    |     |
| 1-4 vs 10-14       | 1  | 1.2140584 | 4.874970 | 0.24528190 | 0.002   | 0.02                    | .   |
| <1 vs ≥15          | 1  | 0.4638427 | 1.573177 | 0.13593302 | 0.115   | 1.00                    |     |
| <1 vs 10-14        | 1  | 0.5087533 | 1.788717 | 0.12972327 | 0.073   | 0.73                    |     |
| ≥15 vs 10-14       | 1  | 0.5336500 | 1.618720 | 0.16828850 | 0.109   | 1.00                    |     |

15

**Table S4. Top ten genera in rectum, oral cavity, penis, and vagina**

| Site    | ASV | Phylum                     | Class                       | Order                    | Family                    | Genus                              |
|---------|-----|----------------------------|-----------------------------|--------------------------|---------------------------|------------------------------------|
| Rectal  | 10  | <i>Firmicutes</i>          | <i>Clostridia</i>           | <i>Clostridiales</i>     | <i>Ruminococcaceae</i>    | <i>Ruminococcus_1</i>              |
|         | 9   | <i>Bacteroidetes</i>       | <i>Bacteroidia</i>          | <i>Bacteroidales</i>     | <i>Prevotellaceae</i>     | NA                                 |
|         | 8   | <i>Spirochaetes</i>        | <i>Spirochaetia</i>         | <i>Spirochaetales</i>    | <i>Spirochaetaceae</i>    | <i>Treponema_2</i>                 |
|         | 7   | <i>Bacteroidetes</i>       | <i>Bacteroidia</i>          | <i>Bacteroidales</i>     | <i>Prevotellaceae</i>     | <i>Alloprevotella</i>              |
|         | 6   | <i>Firmicutes</i>          | <i>Clostridia</i>           | <i>Clostridiales</i>     | <i>Lachnospiraceae</i>    | NA                                 |
|         | 5   | <i>Firmicutes</i>          | <i>Clostridia</i>           | <i>Clostridiales</i>     | <i>Ruminococcaceae</i>    | <i>Ruminococcaceae_UCG-005</i>     |
|         | 4   | <i>Bacteroidetes</i>       | <i>Bacteroidia</i>          | <i>Bacteroidales</i>     | <i>Rikenellaceae</i>      | <i>Rikenellaceae_RC9_gut_group</i> |
|         | 3   | <i>Firmicutes</i>          | <i>Bacilli</i>              | <i>Lactobacillales</i>   | <i>Lactobacillaceae</i>   | <i>Lactobacillus</i>               |
|         | 2   | <i>Epsilon-bacteraeota</i> | <i>Campylobacteria</i>      | <i>Campylobacterales</i> | <i>Helicobacteraceae</i>  | <i>Helicobacter</i>                |
|         | 1   | <i>Bacteroidetes</i>       | <i>Bacteroidia</i>          | <i>Bacteroidales</i>     | <i>Prevotellaceae</i>     | <i>Prevotella_9</i>                |
| Buccal  | 10  | <i>Actinobacteria</i>      | <i>Actinobacteria</i>       | <i>Bifidobacteriales</i> | <i>Bifidobacteriaceae</i> | <i>Alloscardovia</i>               |
|         | 9   | <i>Firmicutes</i>          | <i>Bacilli</i>              | <i>Bacillales</i>        | <i>Family_XI</i>          | <i>Gemella</i>                     |
|         | 8   | <i>Proteobacteria</i>      | <i>Gammaproteobacteria</i>  | <i>Pasteurellales</i>    | <i>Pasteurellaceae</i>    | <i>Haemophilus</i>                 |
|         | 7   | <i>Proteobacteria</i>      | <i>Gammaproteobacteria</i>  | <i>Pasteurellales</i>    | <i>Pasteurellaceae</i>    | <i>Actinobacillus</i>              |
|         | 6   | <i>Bacteroidetes</i>       | <i>Bacteroidia</i>          | <i>Bacteroidales</i>     | <i>Prevotellaceae</i>     | <i>Alloprevotella</i>              |
|         | 5   | <i>Bacteroidetes</i>       | <i>Bacteroidia</i>          | <i>Bacteroidales</i>     | <i>Porphyromonadaceae</i> | <i>Porphyromonas</i>               |
|         | 4   | <i>Proteobacteria</i>      | <i>Gammaproteobacteria</i>  | <i>Pasteurellales</i>    | <i>Pasteurellaceae</i>    | <i>Rodentibacter</i>               |
|         | 3   | <i>Fusobacteria</i>        | <i>Fusobacteriia</i>        | <i>Fusobacteriales</i>   | <i>Fusobacteriaceae</i>   | <i>Fusobacterium</i>               |
|         | 2   | <i>Firmicutes</i>          | <i>Negativicutes</i>        | <i>Selenomonadales</i>   | <i>Veillonellaceae</i>    | <i>Veillonella</i>                 |
|         | 1   | <i>Firmicutes</i>          | <i>Bacilli</i>              | <i>Lactobacillales</i>   | <i>Streptococcaceae</i>   | <i>Streptococcus</i>               |
| Penile  | 10  | <i>Spirochaetes</i>        | <i>Spirochaetia</i>         | <i>Spirochaetales</i>    | <i>Spirochaetaceae</i>    | <i>Treponema_2</i>                 |
|         | 9   | <i>Firmicutes</i>          | <i>Clostridia</i>           | <i>Clostridiales</i>     | <i>Family_XI</i>          | <i>Anaerococcus</i>                |
|         | 8   | <i>Firmicutes</i>          | <i>Bacilli</i>              | <i>Lactobacillales</i>   | <i>Lactobacillaceae</i>   | <i>Lactobacillus</i>               |
|         | 7   | <i>Firmicutes</i>          | <i>Clostridia</i>           | <i>Clostridiales</i>     | <i>Family_XI</i>          | <i>Peptoniphilus</i>               |
|         | 6   | <i>Actinobacteria</i>      | <i>Actinobacteria</i>       | <i>Corynebacteriales</i> | <i>Corynebacteriaceae</i> | <i>Corynebacterium_1</i>           |
|         | 5   | <i>Bacteroidetes</i>       | <i>Bacteroidia</i>          | <i>Bacteroidales</i>     | <i>Prevotellaceae</i>     | <i>Prevotella_9</i>                |
|         | 4   | <i>Epsilon-bacteraeota</i> | <i>Campylobacteria</i>      | <i>Campylobacterales</i> | <i>Campylobacteraceae</i> | <i>Campylobacter</i>               |
|         | 3   | <i>Firmicutes</i>          | <i>Clostridia</i>           | <i>Clostridiales</i>     | <i>Family_XI</i>          | <i>Ezakiella</i>                   |
|         | 2   | <i>Actinobacteria</i>      | <i>Actinobacteria</i>       | <i>Corynebacteriales</i> | <i>Corynebacteriaceae</i> | <i>Corynebacterium</i>             |
|         | 1   | <i>Bacteroidetes</i>       | <i>Bacteroidia</i>          | <i>Bacteroidales</i>     | <i>Porphyromonadaceae</i> | <i>Porphyromonas</i>               |
| Vaginal | 10  | <i>Firmicutes</i>          | <i>Clostridia</i>           | <i>Clostridiales</i>     | <i>Lachnospiraceae</i>    | NA                                 |
|         | 9   | <i>Epsilon-bacteraeota</i> | <i>Campylobacteria</i>      | <i>Campylobacterales</i> | <i>Campylobacteraceae</i> | <i>Campylobacter</i>               |
|         | 8   | <i>Fusobacteria</i>        | <i>Fusobacteriia</i>        | <i>Fusobacteriales</i>   | <i>Leptotrichiaceae</i>   | <i>Streptobacillus</i>             |
|         | 7   | <i>Fusobacteria</i>        | <i>Fusobacteriia</i>        | <i>Fusobacteriales</i>   | <i>Fusobacteriaceae</i>   | <i>Fusobacterium</i>               |
|         | 6   | <i>Actinobacteria</i>      | <i>Actinobacteria</i>       | <i>Corynebacteriales</i> | <i>Corynebacteriaceae</i> | <i>Corynebacterium_1</i>           |
|         | 5   | <i>Firmicutes</i>          | <i>Bacilli</i>              | <i>Lactobacillales</i>   | <i>Lactobacillaceae</i>   | <i>Lactobacillus</i>               |
|         | 4   | <i>Actinobacteria</i>      | <i>Actinobacteria</i>       | <i>Corynebacteriales</i> | <i>Corynebacteriaceae</i> | <i>Corynebacterium</i>             |
|         | 3   | <i>Bacteroidetes</i>       | <i>Bacteroidia</i>          | <i>Bacteroidales</i>     | <i>Prevotellaceae</i>     | <i>Prevotella_9</i>                |
|         | 2   | <i>Proteobacteria</i>      | <i>Gamma-proteobacteria</i> | <i>Pasteurellales</i>    | <i>Pasteurellaceae</i>    | <i>Actinobacillus</i>              |
|         | 1   | <i>Bacteroidetes</i>       | <i>Bacteroidia</i>          | <i>Bacteroidales</i>     | <i>Porphyromonadaceae</i> | <i>Porphyromonas</i>               |

19 **Table S5. Full results of DESeq2 analysis of differential expression between age groups**

| Site                  | Group                      | Phylum                | Class                      | Order                        | Family                     | Genus                      | base Mean                 | log2fold Change        | lfcSE  | stat    | padj    |
|-----------------------|----------------------------|-----------------------|----------------------------|------------------------------|----------------------------|----------------------------|---------------------------|------------------------|--------|---------|---------|
| rectal                | <1 vs. 1-4                 | <i>Bacteroidetes</i>  | <i>Bacteroidia</i>         | <i>Bacteroidales</i>         | NA                         | NA                         | 374.110                   | -2.109                 | 0.394  | 36.813  | 3.3E-06 |
|                       |                            | <i>Spirochaetes</i>   | <i>Spirochaetia</i>        | <i>Spirochaetales</i>        | <i>Spirochaetaceae</i>     | <i>Sphaerochaeta</i>       | 150.789                   | -2.399                 | 0.406  | 35.690  | 5.1E-06 |
|                       |                            | <i>Actinobacteria</i> | <i>Coriobacteriia</i>      | <i>Coriobacteriales</i>      | <i>Coriobacteriaceae</i>   | <i>Collinsella</i>         | 74.808                    | 3.258                  | 0.514  | 93.260  | 2.2E-17 |
|                       |                            | <i>Firmicutes</i>     | <i>Erysipelotrichia</i>    | <i>Erysipelotrichales</i>    | <i>Erysipelotrichaceae</i> | <i>Holdemanella</i>        | 81.686                    | 2.627                  | 0.369  | 126.743 | 3.2E-24 |
|                       |                            | <i>Actinobacteria</i> | <i>Actinobacteria</i>      | <i>Bifidobacteriales</i>     | <i>Bifidobacteriaceae</i>  | <i>Bifidobacterium</i>     | 70.148                    | 10.939                 | 1.389  | 85.864  | 5.5E-16 |
|                       |                            | <i>Firmicutes</i>     | <i>Clostridia</i>          | <i>Clostridiales</i>         | <i>Lachnospiraceae</i>     | <i>Dorea</i>               | 66.288                    | 2.121                  | 0.337  | 85.256  | 5.6E-16 |
|                       |                            | <i>Tenericutes</i>    | <i>Mollicutes</i>          | <i>Anaeroplasmatales</i>     | <i>Anaeroplasmataceae</i>  | <i>Anaeroplasma</i>        | 139.284                   | -2.008                 | 0.391  | 30.593  | 4.4E-05 |
|                       |                            | <i>Firmicutes</i>     | <i>Erysipelotrichia</i>    | <i>Erysipelotrichales</i>    | <i>Erysipelotrichaceae</i> | <i>Catenibacterium</i>     | 106.368                   | 2.656                  | 0.903  | 25.671  | 3.2E-04 |
|                       |                            | <i>Bacteroidetes</i>  | <i>Bacteroidia</i>         | <i>Bacteroidales</i>         | p-2534-18B5_gut_group      | NA                         | 177.213                   | -2.541                 | 0.665  | 17.884  | 6.8E-03 |
|                       |                            | <i>Firmicutes</i>     | <i>Clostridia</i>          | <i>Clostridiales</i>         | <i>Lachnospiraceae</i>     | <i>Roseburia</i>           | 56.320                    | 2.264                  | 0.583  | 42.310  | 3.0E-07 |
|                       |                            | <i>Fibrobacteres</i>  | <i>Fibrobacteria</i>       | <i>Fibrobacterales</i>       | <i>Fibrobacteraceae</i>    | <i>Fibrobacter</i>         | 34.300                    | -2.791                 | 0.574  | 21.339  | 2.0E-03 |
|                       |                            | <i>Firmicutes</i>     | <i>Clostridia</i>          | <i>Clostridiales</i>         | <i>Lachnospiraceae</i>     | <i>Anaerostipes</i>        | 32.126                    | 2.585                  | 0.706  | 31.542  | 3.3E-05 |
|                       |                            | <i>Firmicutes</i>     | <i>Clostridia</i>          | <i>Clostridiales</i>         | NA                         | NA                         | 63.233                    | -2.169                 | 0.523  | 18.455  | 5.4E-03 |
|                       |                            | <i>Bacteroidetes</i>  | <i>Bacteroidia</i>         | <i>Bacteroidales</i>         | <i>Prevotellaceae</i>      | <i>Prevotellaceae gen.</i> | 21.538                    | -2.398                 | 0.635  | 18.968  | 4.4E-03 |
|                       |                            | <i>Tenericutes</i>    | <i>Mollicutes</i>          | <i>Mycoplasmatales</i>       | <i>Mycoplasmataceae</i>    | <i>Ureaplasma</i>          | 11.330                    | 4.375                  | 1.445  | 51.510  | 4.9E-09 |
|                       |                            | <i>Firmicutes</i>     | <i>Clostridia</i>          | <i>Clostridiales</i>         | <i>Peptococcaceae</i>      | <i>Peptococcus</i>         | 6.273                     | 2.132                  | 0.647  | 17.208  | 8.7E-03 |
|                       |                            | <i>Actinobacteria</i> | <i>Coriobacteriia</i>      | <i>Coriobacteriales</i>      | <i>Eggerthellaceae</i>     | <i>Senegalimassilia</i>    | 5.820                     | 2.116                  | 0.773  | 19.630  | 3.6E-03 |
|                       |                            | <i>Bacteroidetes</i>  | <i>Bacteroidia</i>         | <i>Bacteroidales</i>         | <i>Bacteroidaceae</i>      | <i>Bacteroides</i>         | 13.274                    | 2.194                  | 0.766  | 17.017  | 9.2E-03 |
|                       |                            | <i>Proteobacteria</i> | <i>Gammaproteobacteria</i> | <i>Betaproteobacteriales</i> | NA                         | NA                         | 7.613                     | -18.088                | 1.552  | 21.135  | 2.0E-03 |
|                       |                            | 1-4 vs. 5-9           |                            | <i>Actinobacteria</i>        | <i>Actinobacteria</i>      | <i>Bifidobacteriales</i>   | <i>Bifidobacteriaceae</i> | <i>Bifidobacterium</i> | 70.148 | -2.111  | 1.316   |
| <i>Tenericutes</i>    | <i>Mollicutes</i>          |                       |                            | <i>Mycoplasmatales</i>       | <i>Mycoplasmataceae</i>    | <i>Ureaplasma</i>          | 11.330                    | 3.631                  | 1.374  | 51.510  | 4.9E-09 |
| <i>Proteobacteria</i> | <i>Gammaproteobacteria</i> |                       |                            | <i>Betaproteobacteriales</i> | NA                         | NA                         | 7.613                     | -2.175                 | 1.362  | 21.135  | 2.0E-03 |
| 5-9 vs. 10-14         |                            | <i>Proteobacteria</i> | <i>Gammaproteobacteria</i> | <i>Betaproteobacteriales</i> | NA                         | NA                         | 7.613                     | 2.481                  | 1.446  | 21.135  | 2.0E-03 |

|        |               |                        |                            |                                    |                           |                              |         |        |       |        |         |
|--------|---------------|------------------------|----------------------------|------------------------------------|---------------------------|------------------------------|---------|--------|-------|--------|---------|
|        | 10-14 vs. ≥15 | <i>Actinobacteria</i>  | <i>Actinobacteria</i>      | <i>Bifidobacteriales</i>           | <i>Bifidobacteriaceae</i> | <i>Bifidobacterium</i>       | 70.148  | -3.502 | 1.678 | 85.864 | 5.5E-16 |
|        |               | <i>Proteobacteria</i>  | <i>Gammaproteobacteria</i> | <i>Betaproteobacteriales</i>       | NA                        | NA                           | 7.613   | -4.867 | 1.791 | 21.135 | 2.0E-03 |
| buccal | <1 vs. 1-4    | <i>Tenericutes</i>     | <i>Mollicutes</i>          | <i>Mycoplasmatales</i>             | <i>Mycoplasmataceae</i>   | <i>Mycoplasma</i>            | 4.874   | -5.311 | 1.106 | 24.231 | 9.3E-04 |
|        |               | <i>Actinobacteria</i>  | <i>Actinobacteria</i>      | <i>Micrococcales</i>               | <i>Micrococcaceae</i>     | <i>Rothia</i>                | 32.403  | -5.666 | 0.711 | 50.922 | 6.0E-09 |
| penile | <1 vs. 1-4    | <i>Actinobacteria</i>  | <i>Actinobacteria</i>      | <i>Corynebacteriales</i>           | <i>Corynebacteriaceae</i> | <i>Corynebacterium_1</i>     | 824.833 | 2.950  | 1.054 | 52.982 | 7.7E-09 |
|        |               | <i>Firmicutes</i>      | <i>Clostridia</i>          | <i>Clostridiales</i>               | <i>Lachnospiraceae</i>    | Lachnospiraceae AC2044 group | 21.047  | 3.916  | 1.211 | 19.769 | 4.5E-03 |
|        |               | <i>Patescibacteria</i> | <i>Gracilibacteria</i>     | <i>Absconditobacteriales_(SR1)</i> | NA                        | NA                           | 186.420 | -7.630 | 1.693 | 25.172 | 6.9E-04 |
|        |               | <i>Spirochaetes</i>    | <i>Spirochaetia</i>        | <i>Spirochaetales</i>              | <i>Spirochaetaceae</i>    | <i>Treponema_2</i>           | 557.906 | -6.011 | 0.937 | 48.544 | 3.2E-08 |
|        |               | <i>Actinobacteria</i>  | <i>Actinobacteria</i>      | NA                                 | NA                        | NA                           | 258.686 | -9.539 | 1.818 | 28.919 | 1.8E-04 |
|        |               | <i>Bacteroidetes</i>   | <i>Bacteroidia</i>         | <i>Bacteroidales</i>               | NA                        | NA                           | 285.037 | -3.341 | 0.884 | 40.054 | 1.3E-06 |
|        |               | <i>Proteobacteria</i>  | <i>Gammaproteobacteria</i> | <i>Pseudomonadales</i>             | <i>Moraxellaceae</i>      | <i>Acinetobacter</i>         | 38.698  | 3.871  | 1.552 | 26.183 | 5.2E-04 |
|        |               | <i>Firmicutes</i>      | <i>Clostridia</i>          | <i>Clostridiales</i>               | <i>Family_XI</i>          | NA                           | 142.282 | -5.777 | 1.804 | 22.675 | 1.5E-03 |
|        |               | <i>Firmicutes</i>      | <i>Negativicutes</i>       | <i>Selenomonadales</i>             | <i>Veillonellaceae</i>    | <i>Dialister</i>             | 96.458  | -3.591 | 0.940 | 20.921 | 2.9E-03 |
|        | 1-4 vs. 5-9   | <i>Firmicutes</i>      | <i>Bacilli</i>             | <i>Lactobacillales</i>             | <i>Streptococcaceae</i>   | <i>Streptococcus</i>         | 56.763  | -3.525 | 0.888 | 19.065 | 5.7E-03 |
|        |               | <i>Actinobacteria</i>  | <i>Actinobacteria</i>      | <i>Corynebacteriales</i>           | <i>Corynebacteriaceae</i> | <i>Corynebacterium_1</i>     | 824.833 | -6.725 | 0.992 | 52.982 | 7.7E-09 |
|        |               | <i>Firmicutes</i>      | <i>Clostridia</i>          | <i>Clostridiales</i>               | <i>Lachnospiraceae</i>    | Lachnospiraceae AC2044 group | 21.047  | -3.481 | 1.144 | 19.769 | 4.5E-03 |
|        |               | <i>Actinobacteria</i>  | <i>Actinobacteria</i>      | <i>Corynebacteriales</i>           | <i>Corynebacteriaceae</i> | NA                           | 424.314 | 8.119  | 1.597 | 22.709 | 1.5E-03 |
|        |               | <i>Patescibacteria</i> | <i>Gracilibacteria</i>     | <i>Absconditobacteriales_(SR1)</i> | NA                        | NA                           | 186.420 | 5.042  | 1.568 | 25.172 | 6.9E-04 |
|        |               | <i>Spirochaetes</i>    | <i>Spirochaetia</i>        | <i>Spirochaetales</i>              | <i>Spirochaetaceae</i>    | <i>Treponema_2</i>           | 557.906 | 3.900  | 0.877 | 48.544 | 3.2E-08 |
|        |               | <i>Actinobacteria</i>  | <i>Actinobacteria</i>      | NA                                 | NA                        | NA                           | 258.686 | 7.335  | 1.678 | 28.919 | 1.8E-04 |
|        |               | <i>Bacteroidetes</i>   | <i>Bacteroidia</i>         | <i>Bacteroidales</i>               | NA                        | NA                           | 285.037 | 3.231  | 0.832 | 40.054 | 1.3E-06 |
|        |               | <i>Proteobacteria</i>  | <i>Gammaproteobacteria</i> | <i>Pseudomonadales</i>             | <i>Moraxellaceae</i>      | <i>Acinetobacter</i>         | 38.698  | -2.440 | 1.473 | 26.183 | 5.2E-04 |
|        |               | <i>Firmicutes</i>      | <i>Clostridia</i>          | <i>Clostridiales</i>               | <i>Family_XI</i>          | NA                           | 142.282 | 6.504  | 1.705 | 22.675 | 1.5E-03 |
|        |               | <i>Firmicutes</i>      | <i>Negativicutes</i>       | <i>Selenomonadales</i>             | <i>Veillonellaceae</i>    | <i>Dialister</i>             | 96.458  | 3.461  | 0.886 | 20.921 | 2.9E-03 |

|                     |                        |                            |                                    |                            |                               |         |        |       |        |         |
|---------------------|------------------------|----------------------------|------------------------------------|----------------------------|-------------------------------|---------|--------|-------|--------|---------|
| 5-9 vs. 10-14       | <i>Proteobacteria</i>  | <i>Gammaproteobacteria</i> | <i>Pseudomonadales</i>             | <i>Moraxellaceae</i>       | <i>Acinetobacter</i>          | 38.698  | -4.552 | 1.676 | 26.183 | 5.2E-04 |
|                     | <i>Firmicutes</i>      | <i>Clostridia</i>          | <i>Clostridiales</i>               | <i>Family_XI</i>           | NA                            | 142.282 | 3.067  | 2.123 | 22.675 | 1.5E-03 |
| 10-14 vs. $\geq 15$ | <i>Firmicutes</i>      | <i>Bacilli</i>             | <i>Lactobacillales</i>             | <i>Streptococcaceae</i>    | <i>Streptococcus</i>          | 56.763  | 2.897  | 1.314 | 19.065 | 5.7E-03 |
|                     | <i>Actinobacteria</i>  | <i>Actinobacteria</i>      | <i>Corynebacteriales</i>           | <i>Corynebacteriaceae</i>  | <i>Corynebacterium_1</i>      | 824.833 | 5.666  | 1.451 | 52.982 | 7.7E-09 |
|                     | <i>Firmicutes</i>      | <i>Clostridia</i>          | <i>Clostridiales</i>               | <i>Lachnospiraceae</i>     | Lachnospiraceae AC2044 group  | 21.047  | 6.904  | 1.927 | 19.769 | 4.5E-03 |
|                     | <i>Patescibacteria</i> | <i>Gracilibacteria</i>     | <i>Absconditabacteriales_(SR1)</i> | NA                         | NA                            | 186.420 | -7.812 | 2.326 | 25.172 | 6.9E-04 |
|                     | <i>Spirochaetes</i>    | <i>Spirochaetia</i>        | <i>Spirochaetales</i>              | <i>Spirochaetaceae</i>     | <i>Treponema_2</i>            | 557.906 | -5.037 | 1.297 | 48.544 | 3.2E-08 |
|                     | <i>Actinobacteria</i>  | <i>Actinobacteria</i>      | NA                                 | NA                         | NA                            | 258.686 | -7.572 | 2.508 | 28.919 | 1.8E-04 |
|                     | <i>Bacteroidetes</i>   | <i>Bacteroidia</i>         | <i>Bacteroidales</i>               | NA                         | NA                            | 285.037 | -5.059 | 1.228 | 40.054 | 1.3E-06 |
|                     | <i>Proteobacteria</i>  | <i>Gammaproteobacteria</i> | <i>Pseudomonadales</i>             | <i>Moraxellaceae</i>       | <i>Acinetobacter</i>          | 38.698  | 10.044 | 2.320 | 26.183 | 5.2E-04 |
|                     | <i>Firmicutes</i>      | <i>Clostridia</i>          | <i>Clostridiales</i>               | <i>Christensenellaceae</i> | Christensenellaceae R-7 group | 140.411 | -4.939 | 1.204 | 24.800 | 7.0E-04 |
|                     | <i>Firmicutes</i>      | <i>Clostridia</i>          | <i>Clostridiales</i>               | <i>Family_XI</i>           | NA                            | 142.282 | -4.983 | 2.595 | 22.675 | 1.5E-03 |

21 **Table S6. Pairwise adonis results - predicted functional features in rectal community**

| Pairs (age groups) | Df | SumsOfSqs    | F.Model   | R2         | p.value | P.adjusted (Bonferroni) | sig |
|--------------------|----|--------------|-----------|------------|---------|-------------------------|-----|
| 5-9 vs 1-4         | 1  | 0.0010306721 | 0.7769953 | 0.01530211 | 0.532   | 1.00                    |     |
| 5-9 vs <1          | 1  | 0.0072127812 | 6.1328801 | 0.11542533 | 0.001   | 0.01                    | *   |
| 5-9 vs ≥15         | 1  | 0.0018513156 | 1.2045526 | 0.02996060 | 0.275   | 1.00                    |     |
| 5-9 vs 10-14       | 1  | 0.0010910491 | 0.9177349 | 0.01956051 | 0.426   | 1.00                    |     |
| 1-4 vs <1          | 1  | 0.0042799811 | 3.3419498 | 0.07536768 | 0.006   | 0.06                    |     |
| 1-4 vs ≥15         | 1  | 0.0016181180 | 0.9339795 | 0.02752343 | 0.399   | 1.00                    |     |
| 1-4 vs 10-14       | 1  | 0.0006638146 | 0.5114213 | 0.01262413 | 0.765   | 1.00                    |     |
| <1 vs ≥15          | 1  | 0.0041576410 | 2.7042054 | 0.08268678 | 0.026   | 0.26                    |     |
| <1 vs 10-14        | 1  | 0.0036855949 | 3.3365290 | 0.08271731 | 0.004   | 0.04                    | .   |
| ≥15 vs 10-14       | 1  | 0.0016182615 | 1.0306191 | 0.03431894 | 0.391   | 1.00                    |     |

22  
23  
24  
25  
26

**Table S7. Pairwise adonis results - predicted functional features in oral community**

| Pairs (age groups) | Df | SumsOfSqs    | F.Model   | R2          | p.value | P.adjusted (Bonferroni) | sig |
|--------------------|----|--------------|-----------|-------------|---------|-------------------------|-----|
| 5-9 vs 1-4         | 1  | 0.0016295221 | 0.8662330 | 0.017029627 | 0.458   | 1.00                    |     |
| 5-9 vs <1          | 1  | 0.0069453884 | 4.7962496 | 0.092598396 | 0.002   | 0.02                    | .   |
| 5-9 vs ≥15         | 1  | 0.0009410774 | 0.4815296 | 0.012196326 | 0.744   | 1.00                    |     |
| 5-9 vs 10-14       | 1  | 0.0012980851 | 0.7022642 | 0.014721822 | 0.574   | 1.00                    |     |
| 1-4 vs <1          | 1  | 0.0065479066 | 4.2132201 | 0.093185580 | 0.008   | 0.08                    |     |
| 1-4 vs ≥15         | 1  | 0.0005921717 | 0.2718689 | 0.008171133 | 0.893   | 1.00                    |     |
| 1-4 vs 10-14       | 1  | 0.0020416191 | 1.0141864 | 0.024139143 | 0.355   | 1.00                    |     |
| <1 vs ≥15          | 1  | 0.0060636311 | 3.9647844 | 0.116732213 | 0.008   | 0.08                    |     |
| <1 vs 10-14        | 1  | 0.0092378898 | 6.2089569 | 0.140445678 | 0.001   | 0.01                    | *   |
| ≥15 vs 10-14       | 1  | 0.0005139447 | 0.2383155 | 0.007881241 | 0.939   | 1.00                    |     |

27  
28

29 **Table S8. Pairwise adonis results - predicted functional features in penile community**

| Pairs (age groups) | Df | SumsOfSqs   | F.Model   | R2         | p.value | P.adjusted (Bonferroni) | sig |
|--------------------|----|-------------|-----------|------------|---------|-------------------------|-----|
| 5-9 vs 1-4         | 1  | 0.017268293 | 6.113696  | 0.24344071 | 0.005   | 0.05                    | .   |
| 5-9 vs <1          | 1  | 0.008561219 | 2.406054  | 0.13072079 | 0.066   | 0.66                    |     |
| 5-9 vs ≥15         | 1  | 0.009060431 | 2.384076  | 0.16574411 | 0.068   | 0.68                    |     |
| 5-9 vs 10-14       | 1  | 0.005526593 | 1.211777  | 0.07966046 | 0.270   | 1.00                    |     |
| 1-4 vs <1          | 1  | 0.028565811 | 11.074107 | 0.39445982 | 0.001   | 0.01                    | *   |
| 1-4 vs ≥15         | 1  | 0.003106345 | 1.241572  | 0.08717942 | 0.287   | 1.00                    |     |
| 1-4 vs 10-14       | 1  | 0.026797842 | 7.917297  | 0.34547255 | 0.002   | 0.02                    | .   |
| <1 vs ≥15          | 1  | 0.011659878 | 3.257815  | 0.24572791 | 0.056   | 0.56                    |     |
| <1 vs 10-14        | 1  | 0.005475232 | 1.215907  | 0.09200333 | 0.323   | 1.00                    |     |
| ≥15 vs 10-14       | 1  | 0.015767371 | 2.953413  | 0.26963402 | 0.048   | 0.48                    |     |

30



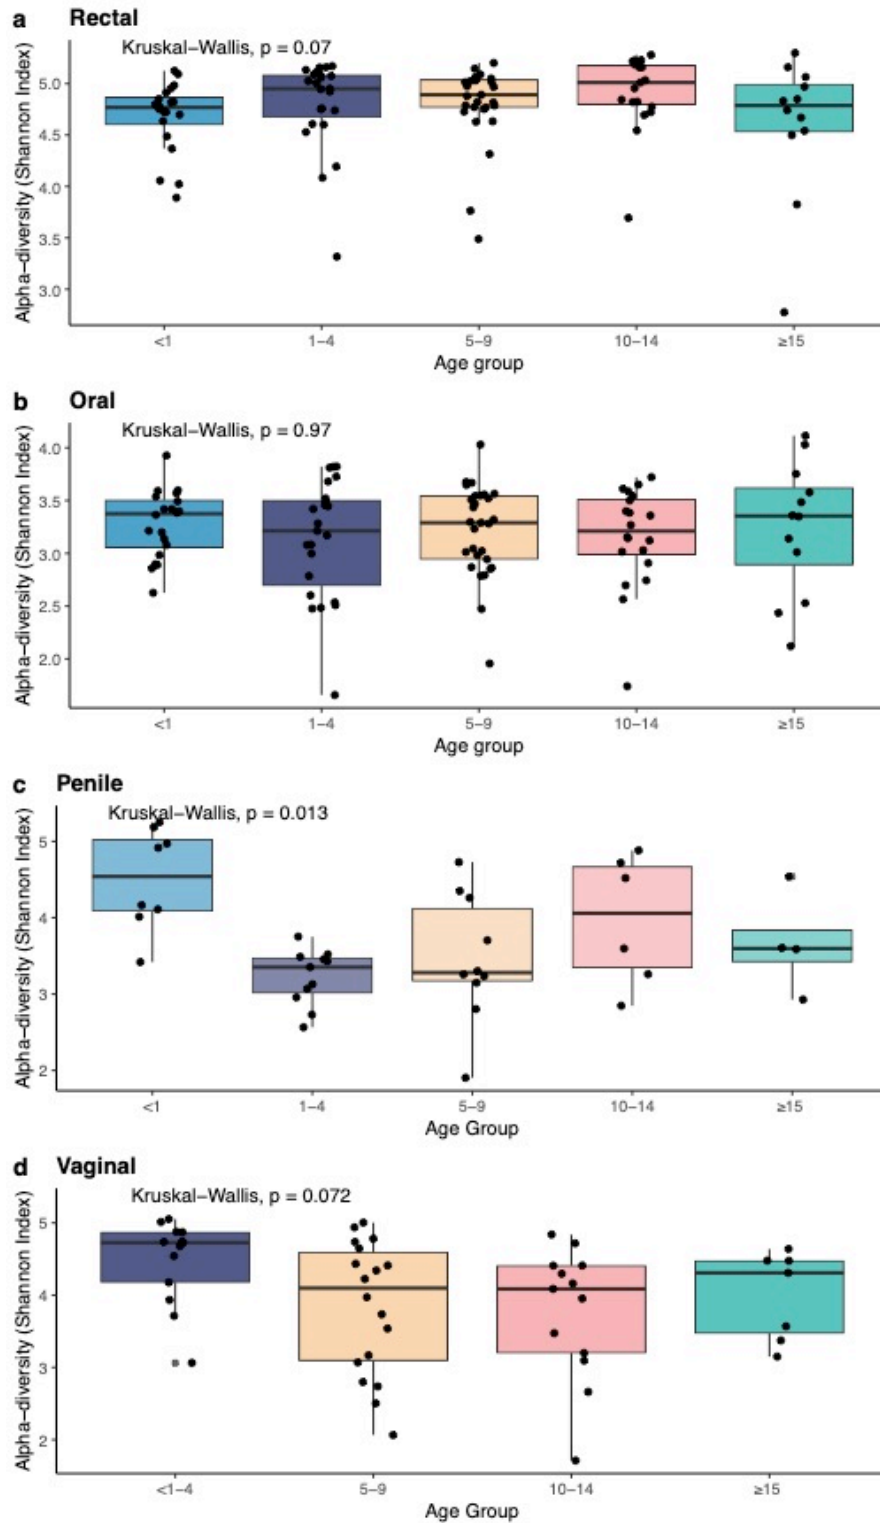

31  
 32 **Figure S1.** Alpha-diversity (Shannon Index) of macaque (a) rectal, (b) oral, (c) penile, and (d)  
 33 vaginal microbiomes across age groups.

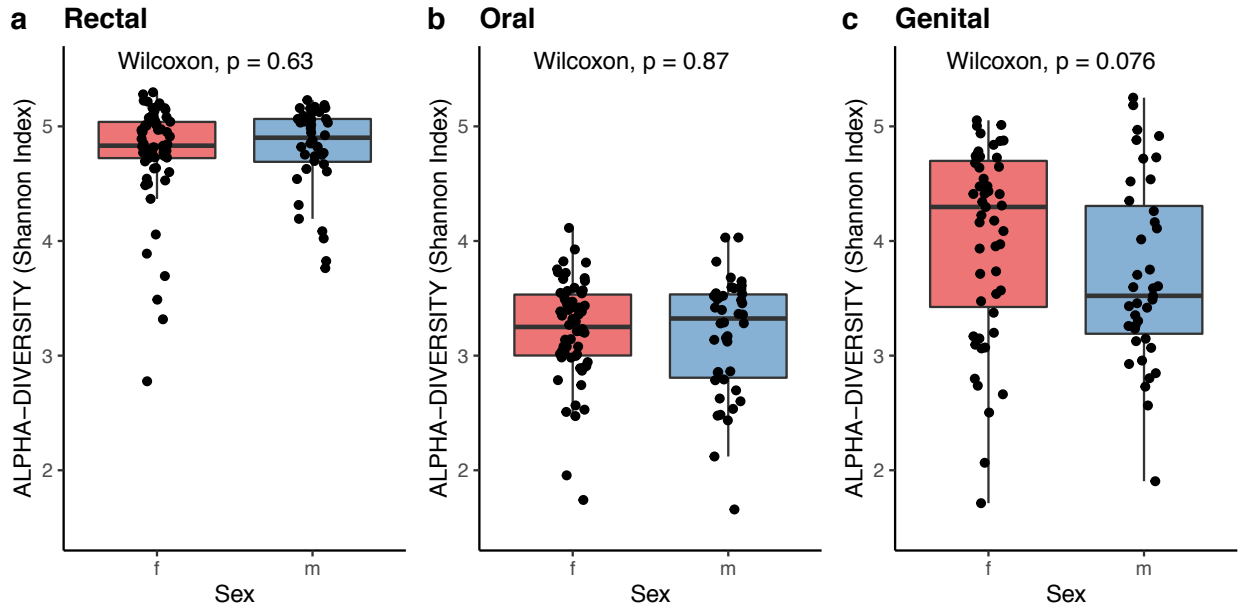

34 **Figure S2.** Alpha-diversity (Shannon Index) of the (a) rectal, (b) oral, and (c) genital  
 35 microbiomes of males and females.

36  
 37  
 38

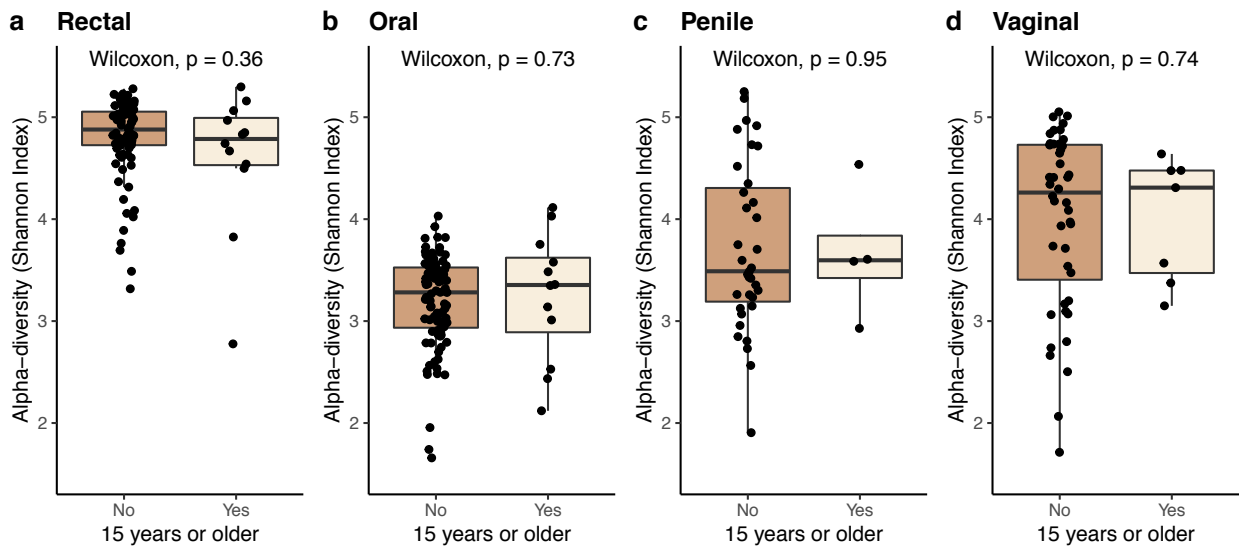

39  
 40 **Figure S3.** Differences in alpha-diversity (Shannon Index) in the (a) rectal, (b) oral,  
 41 and (d) vaginal microbiomes of macaques younger than 15 years or 15 years and older.

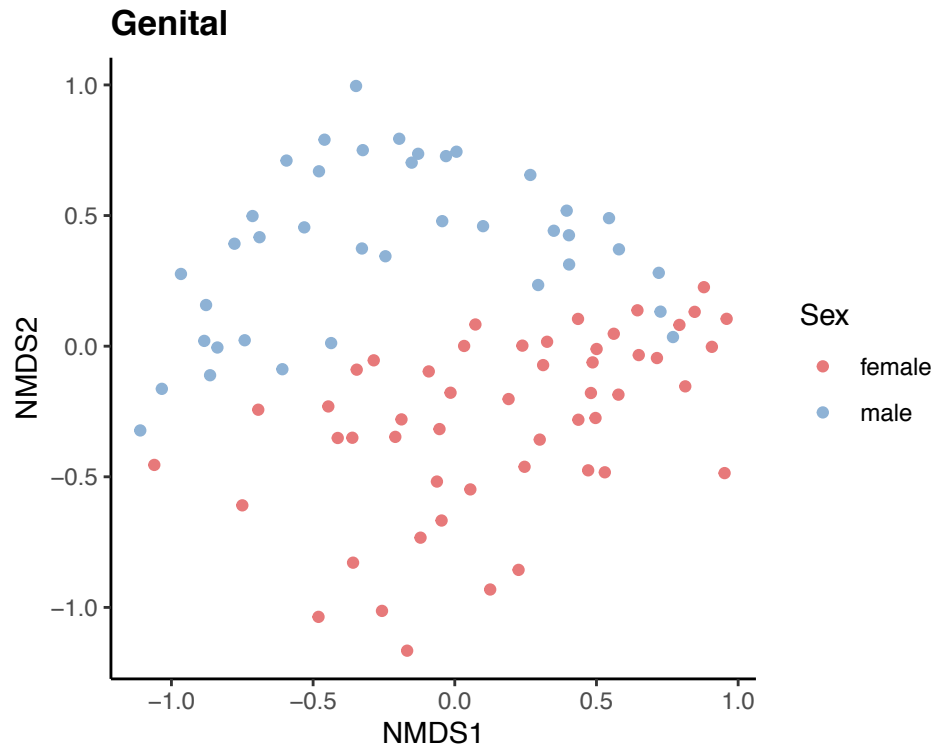

42  
43 **Figure S4.** Beta-diversity of genital samples by sex. Bray-Curtis dissimilarity ordinated with non-  
44 metric multidimensional scaling (NMDS) shows clear separation of male and female genital  
45 samples.  
46

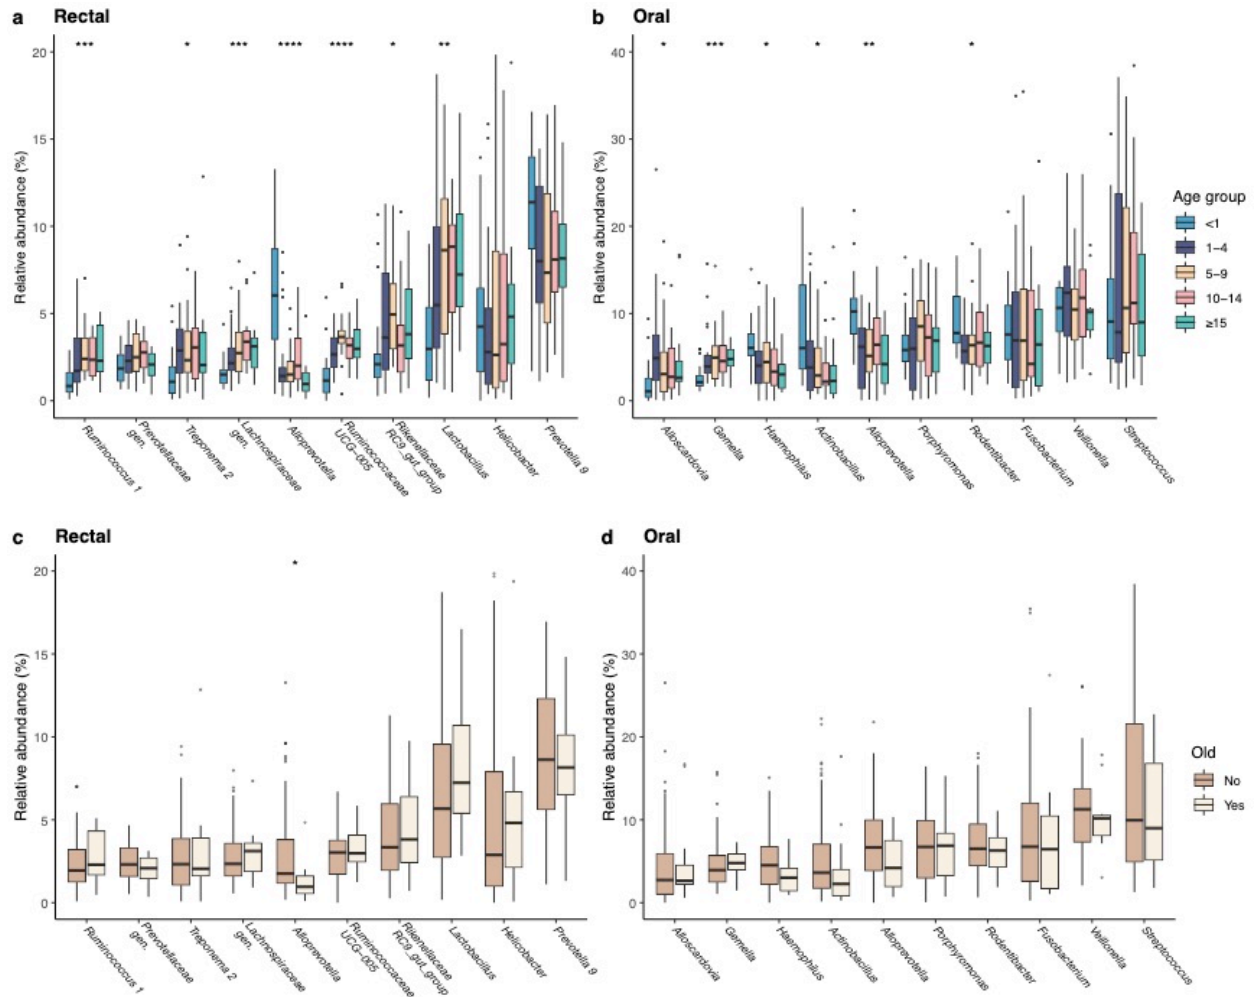

47  
 48 **Figure S5.** Differences in relative abundance of top ten genera (a) across all age groups in  
 49 rectal and (b) oral communities, and between macaques  $\geq 15$  years old and  $< 15$  years old in (c)  
 50 rectal and (d) oral communities. The asterisk indicates a significant difference between the  
 51 groups (a, b: Kruskal-Wallis; c, d: Wilcoxon).

52

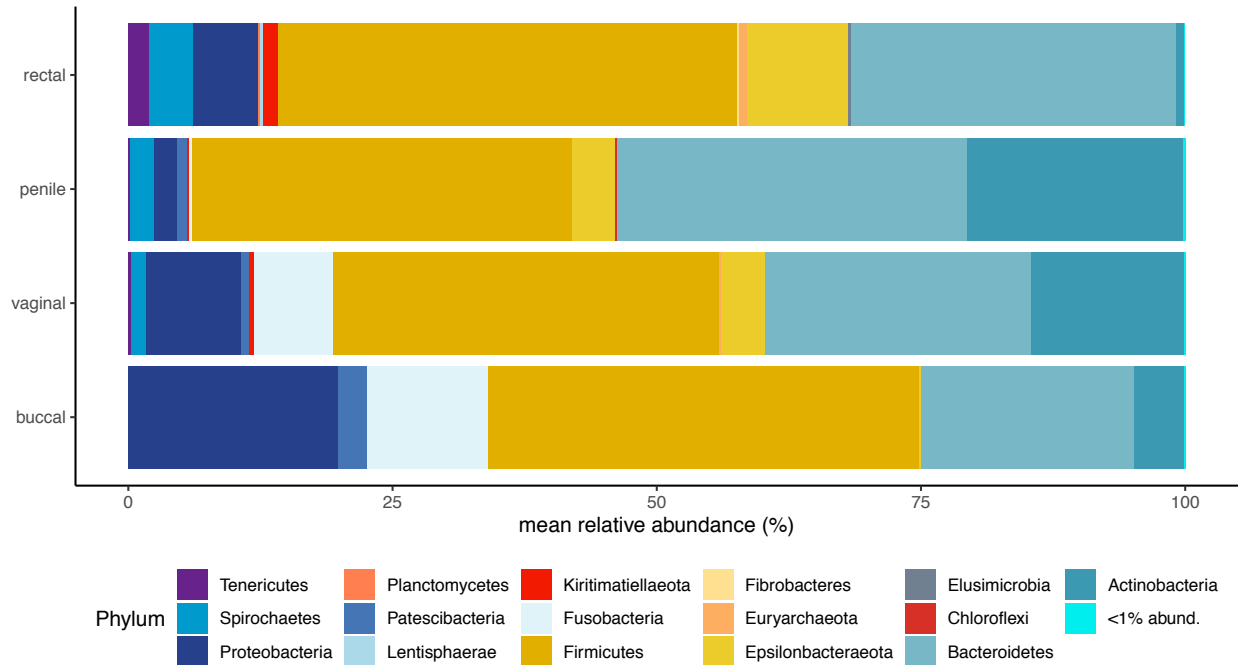

53  
 54 **Figure S6.** Average community composition of the rectal, penile, vaginal, and oral microbiomes  
 55 of free-ranging rhesus macaques. Stacked bars show mean relative abundance of each phylum  
 56 across all samples for each body site. Phyla in the stacked bars and the legend follow the same  
 57 order, starting with “<1% abundance” at the right of the bars and ending with “*Tenericutes*” on  
 58 the left.  
 59

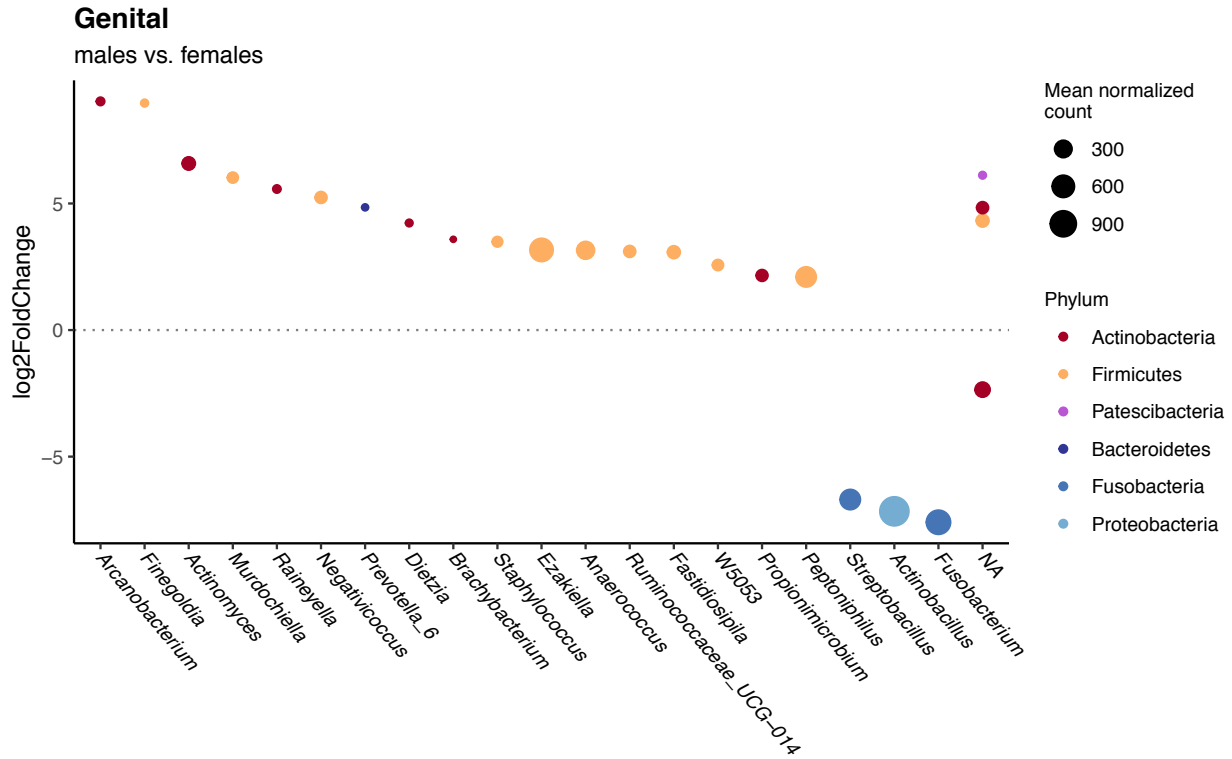

60  
 61 **Figure S7.** Sex differences in genital microbiome. Figure shows bacterial taxa that are  
 62 significantly differentially abundant in male genitals vs. female genitals with a log2fold change of  
 63 at least +/- 2.

64  
 65  
 66

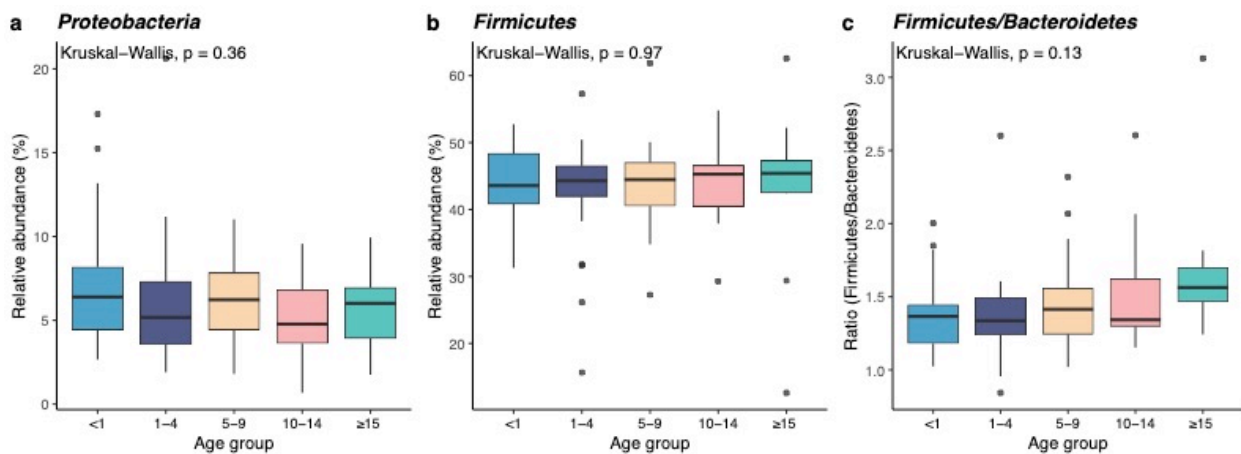

67 **Figure S8.** Relative abundances of the phyla (a) *Proteobacteria* and (b) *Firmicutes*, and the (c)  
 68 ratio of *Firmicutes* to *Bacteroidetes* do not differ across age groups.

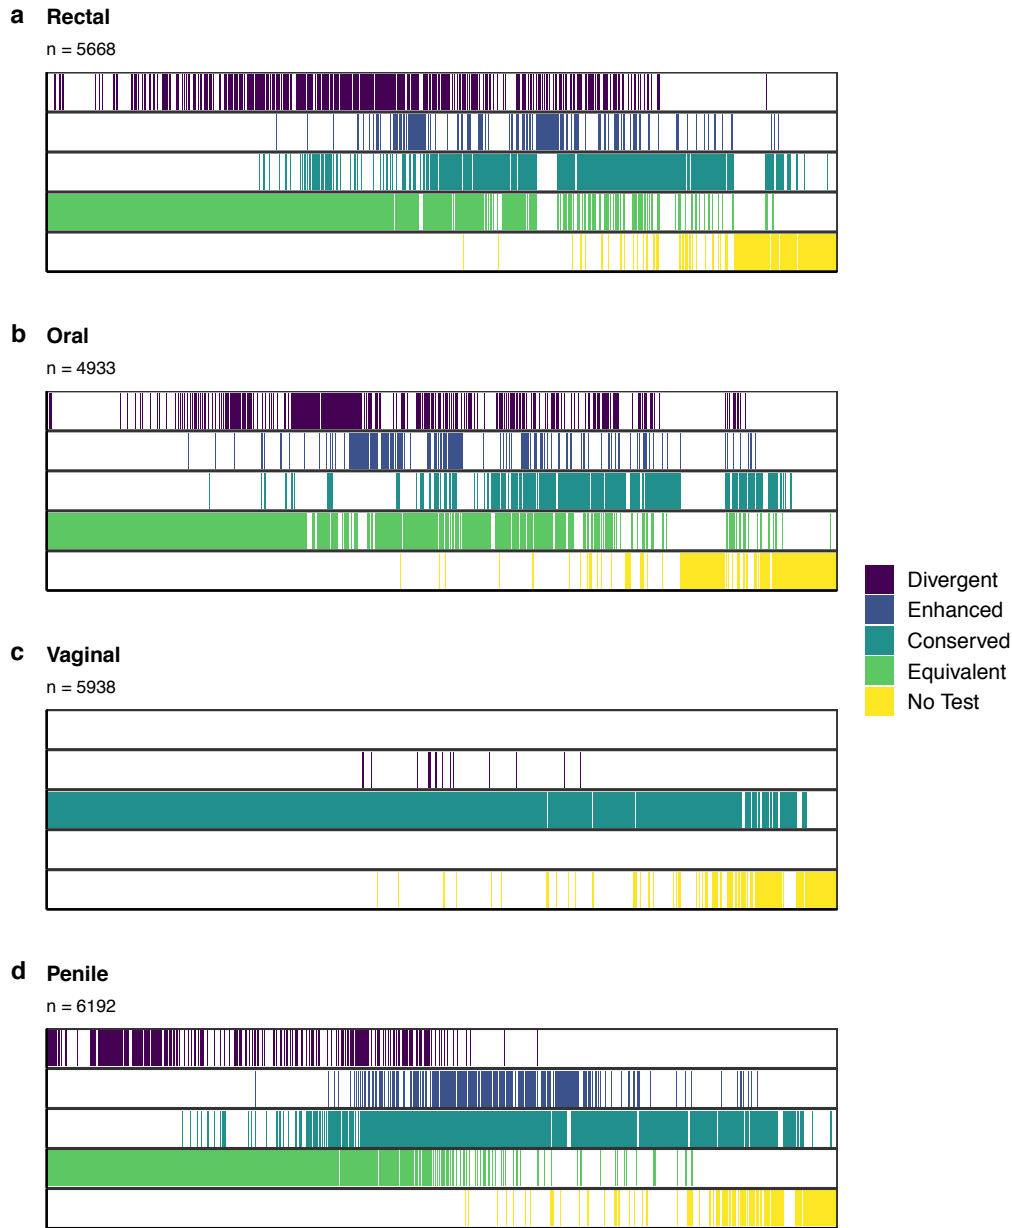

69 **Figure S9.** Differences in predicted microbial functions across age groups in (a) rectal, (b) oral,  
 70 (c) vaginal, and (d) penile communities. Each vertical line is a predicted KEGG gene/function,  
 71 classified by the CatFun function in FunkyTax as enhanced (frequency of function differs among  
 72 groups but contributing community does not), divergent (frequency of function and contributing  
 73 community differs among groups), conserved (frequency of function and contributing community  
 74 does not differ among groups), or equivalent (frequency of function does not differ among  
 75 groups but contributing community differs).

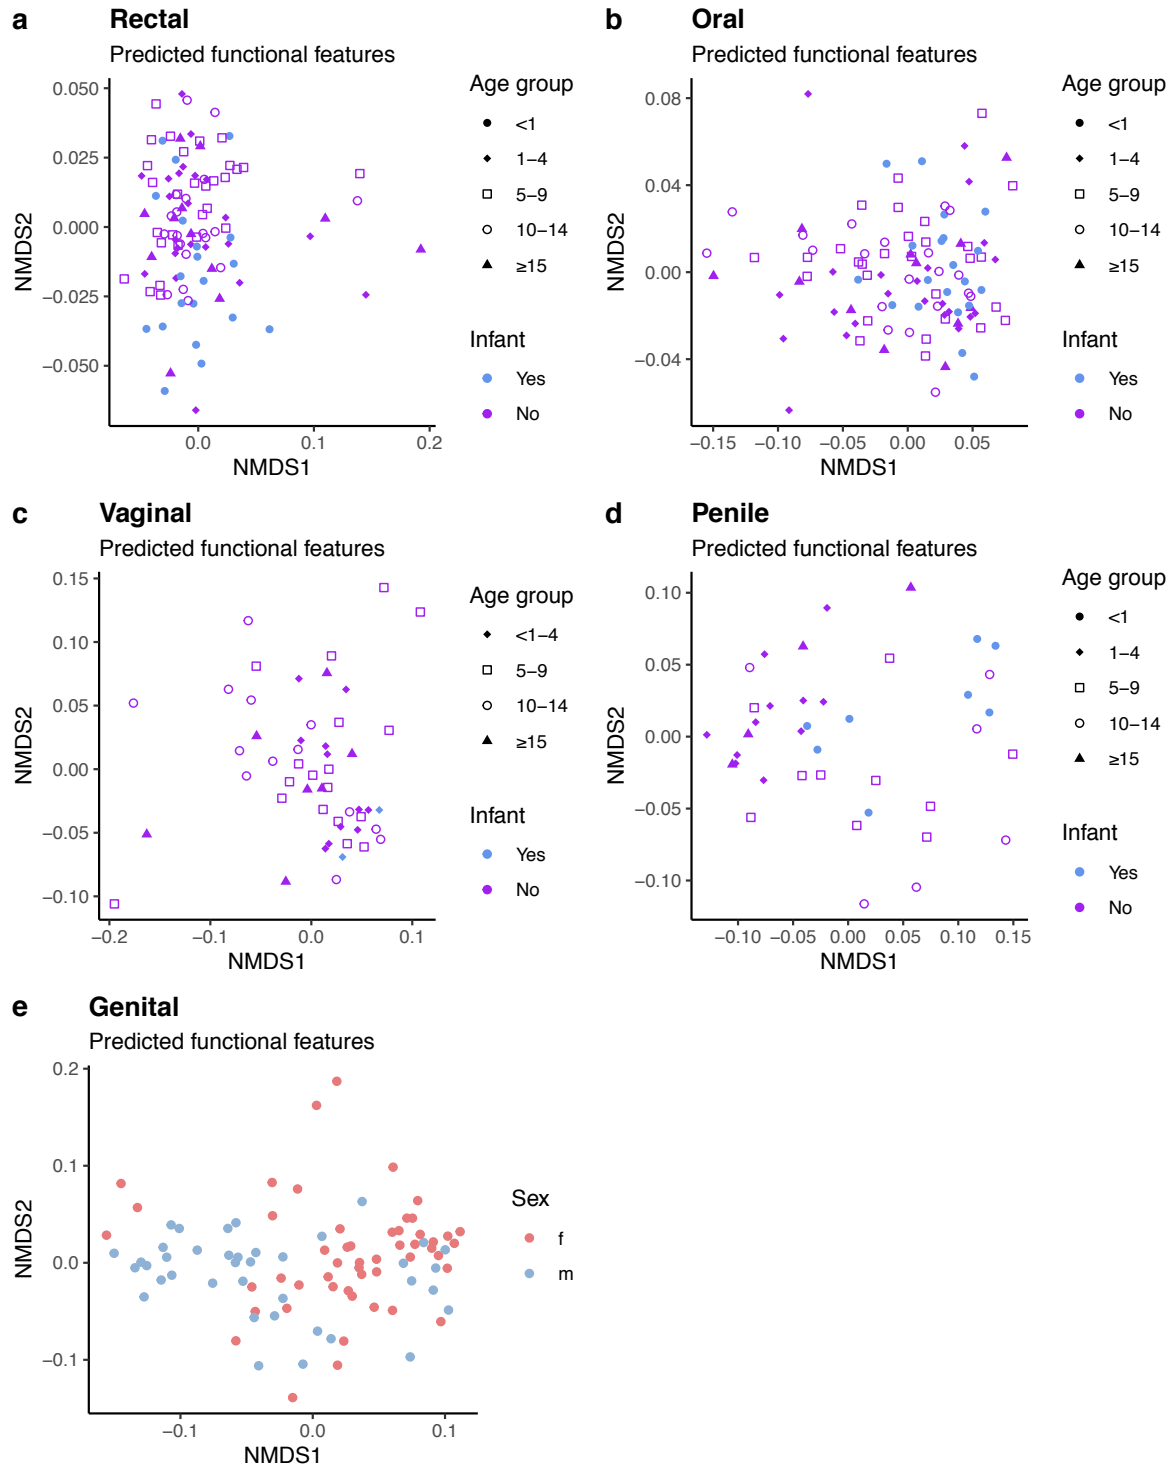

76

77 **Figure S10.** Bray-Curtis distances of predicted functional features of (a) rectal, (b) oral, (c)

78 vaginal, (d) penile, and (e) genital microbial communities ordinated by NMDS.



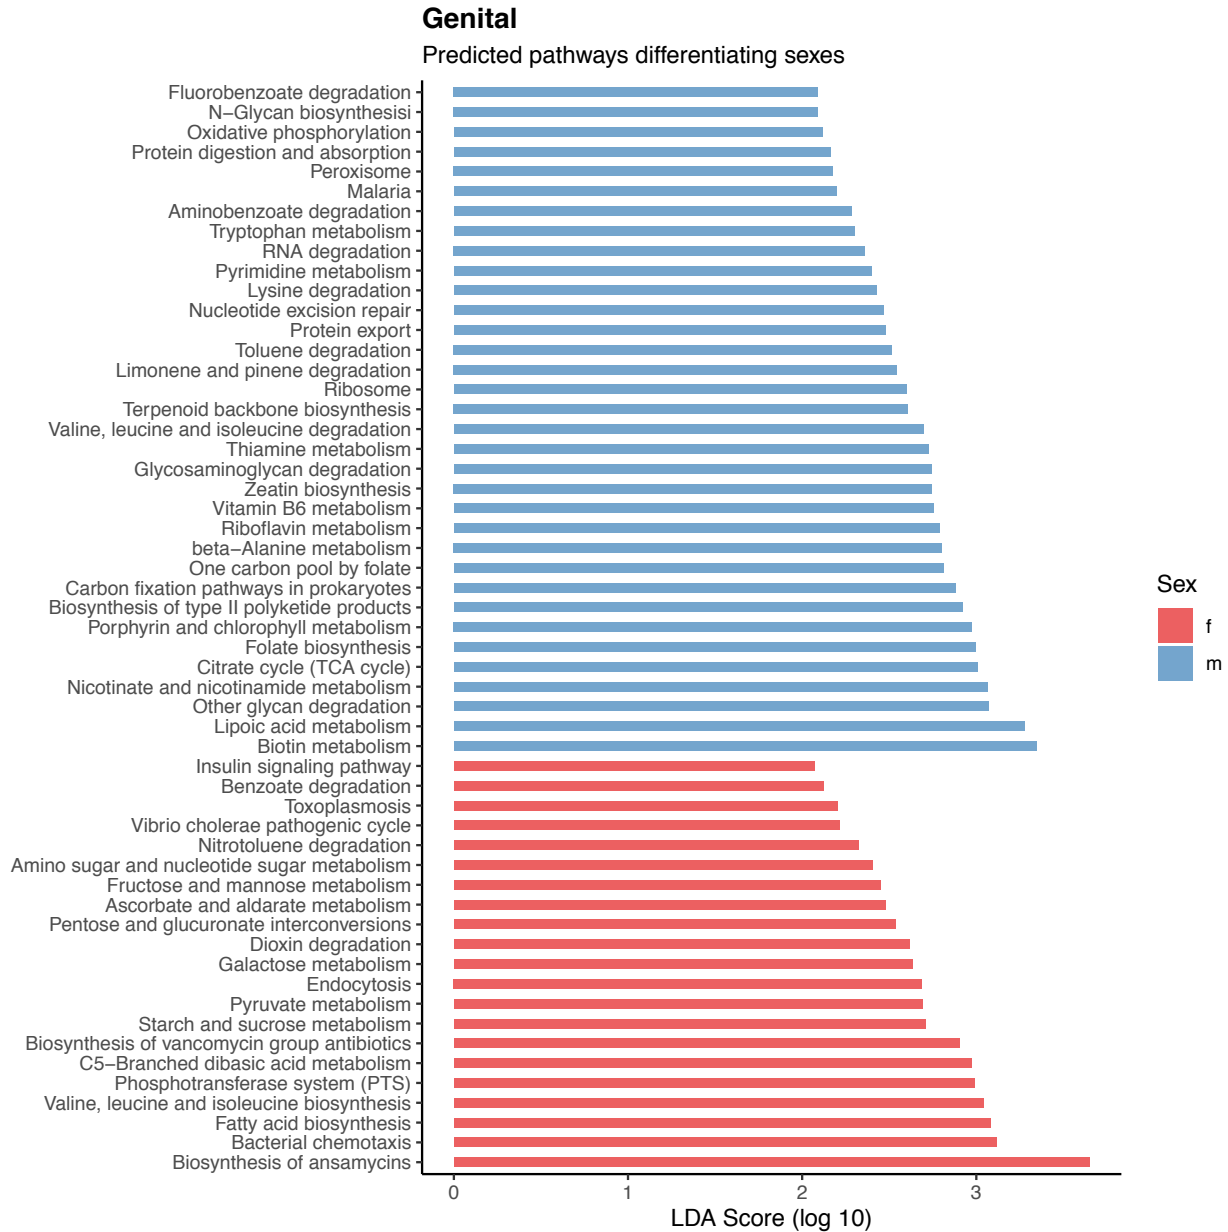

79  
 80 **Figure S11.** Functional pathways predicted by PiCrust2 that differentiate male and female  
 81 genital communities. Pathways identified by LefSe with LDA effect size  $\geq 2$  and  $\alpha \leq 0.01$ .
